# Supplementary material
Source: publisher site journal article supplement (https://www.degruyter.com/publication/isbn/9783110305234/downloadAsset/9783110305234_Contents.pdf)
Supplement: Supplementary file 1 [file 9783110305234_Contents.pdf]

# Contents

## Acknowledgements — 1

Regine Eckardt and Manfred Sailer

## Beyond “any” and “ever” — 3

Johan van der Auwera & Lauren Van Alsenoy

## Mapping the West Germanic *any*’s — 21

Jack Hoeksema

## Polarity items in Strawsonian contexts – A comparison — 47

Volker Gast

## From æghwæðer to either:

## The distribution of a negative polarity item in historical perspective — 79

Johan Brandtler

## Evaluability – An Alternative Approach to Polarity Sensitivity — 103

Luka Crnić

## How to get even with desires and imperatives — 127

I-Ta Chris Hsieh

## On NPI Licensing in Possibility Conditionals — 155

Jon Gajewski

## An analogy between a connected exceptive phrase and polarity items — 183

Elena Herburger and Simon Mauck

## The chance of being an NPI — 213

Robert Levine

## The modal *need* VP gap (non)anomaly — 241

Regine Eckardt and Eva Csipak

## Minimizers – Towards pragmatic licensing — 267

Ai Matsui

**Revisiting the Licensing Problem through Understating NPIs: The Case of Japanese *Anmari* ‘(not) very/much’ — 299**

Edgar Onea and Manfred Sailer

**Really *all that* clear? — 323**

Mingya Liu, Regine Eckardt, and Janina Radó

**Polarity in Context — 351**

**Subject index — 369**
